# Supplementary material for: A remarkable high entropy effect on the magnetic behaviour of quadruple perovskites
Source: Royal Society of Chemistry journal article supplement (doi:10.1039/d3tc03607c), 2023-12-08
Supplement: d3tc03607c1.pdf [file d3tc03607c1.pdf]

**Electronic Supplementary Material**

**Remarkable high entropy effect on magnetic behaviour in quadruple perovskites**

Radhamadhab Das<sup>1</sup>, Shreyashi Chowdhury<sup>1</sup>, Supin K K<sup>2,3</sup>, M. Vasundhara<sup>2,3,\*</sup>, Arup Gayen<sup>4</sup> and  
Md. Motin Seikh<sup>1,\*</sup>

<sup>1</sup>*Department of Chemistry, Visva-Bharati University, Santiniketan–731235, West Bengal, India*

<sup>2</sup>*Polymers and Functional Materials Department, CSIR-Indian Institute of Chemical  
Technology, Tarnaka, Hyderabad-500007, India*

<sup>3</sup>*Academy of Scientific and Innovative Research (AcSIR), Ghaziabad-201002, India.*

<sup>4</sup>*Department of Chemistry, Jadavpur University, Kolkata 700032, India*

---

*\*For correspondence:*

[mdmotin.seikh@visva-bharati.ac.in](mailto:mdmotin.seikh@visva-bharati.ac.in) (Md. M. Seikh)

[mvas@iict.res.in](mailto:mvas@iict.res.in) (M. Vasundhara)

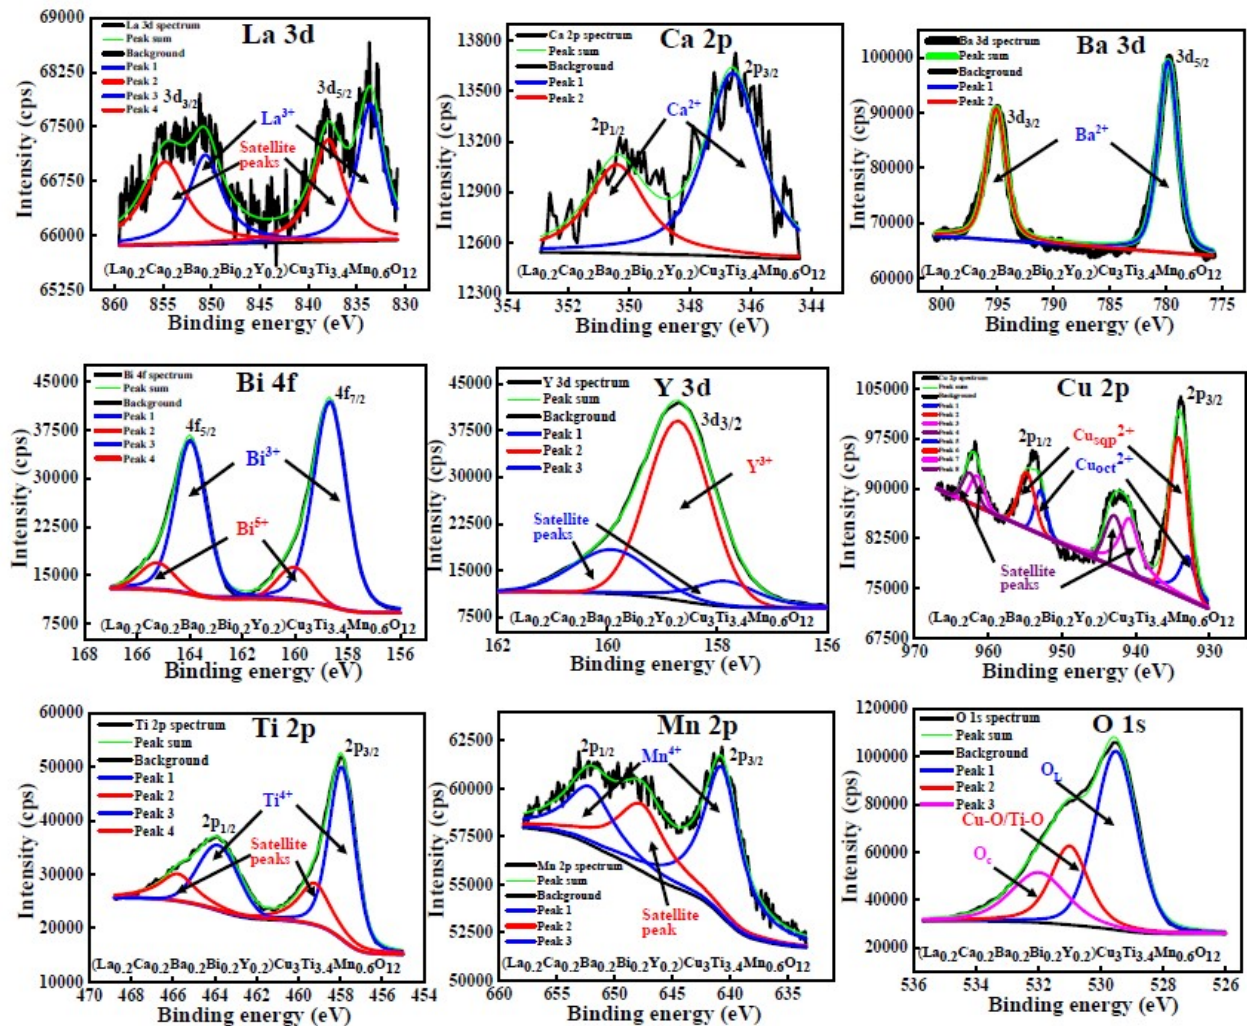

**Fig. S1:** High resolution XPS spectra of La 3d, Ca 2p, Ba 3d, Bi 4f, Y 3d, Cu 2p, Ti 2p, Mn 2p and O 1s for  $(\text{La}_{0.2}\text{Ca}_{0.2}\text{Ba}_{0.2}\text{Bi}_{0.2}\text{Y}_{0.2})\text{Cu}_3\text{Ti}_{3.4}\text{Mn}_{0.6}\text{O}_{12}$ .

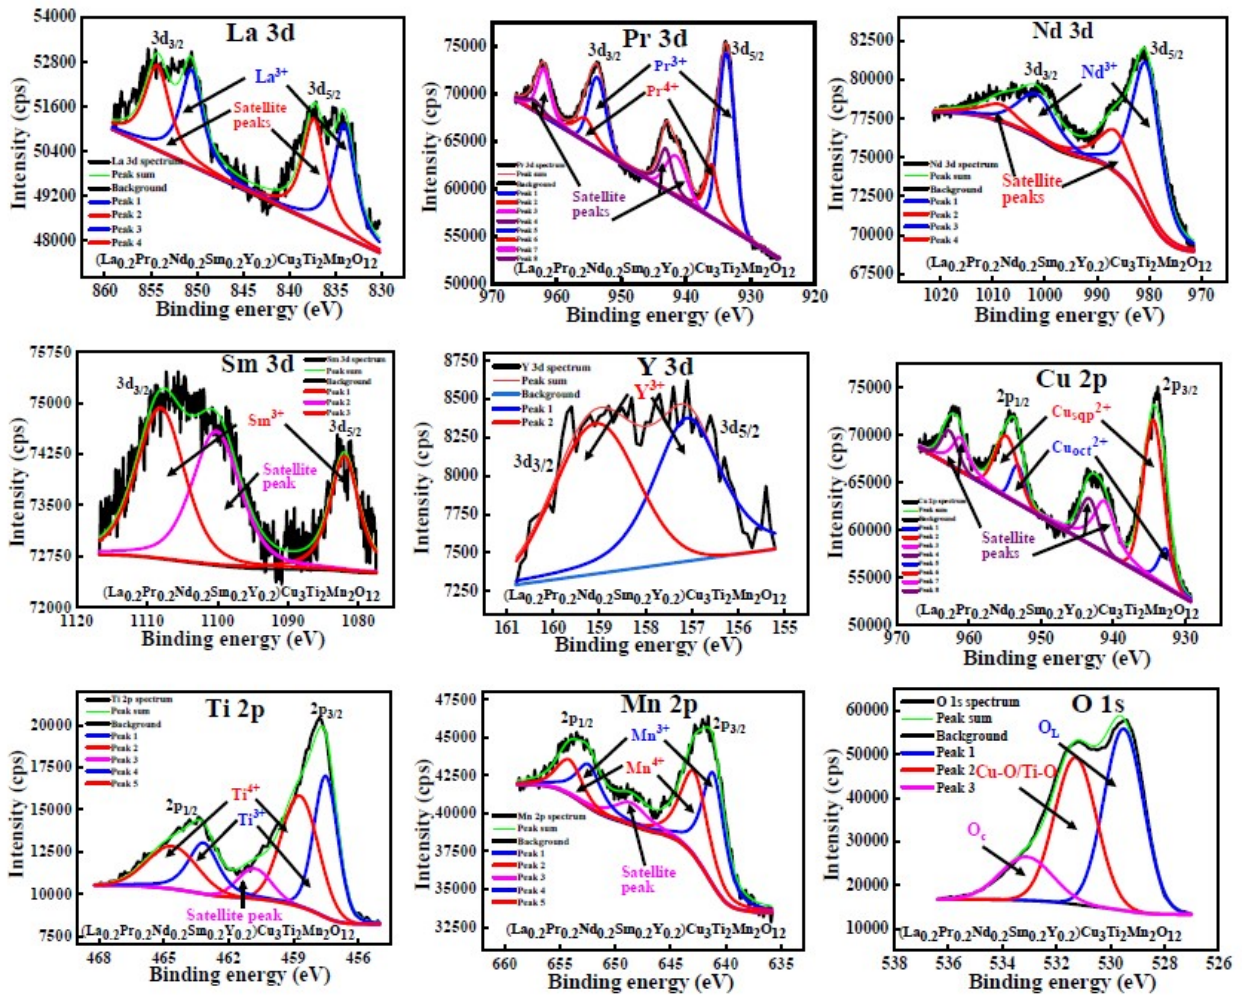

**Fig. S2:** High resolution XPS spectra of La 3d, Pr 3d, Nd 3d, Sm3d, Y 3d, Cu 2p, Ti 2p, Mn 2p and O 1s for  $(\text{La}_{0.2}\text{Pr}_{0.2}\text{Nd}_{0.2}\text{Sm}_{0.2}\text{Y}_{0.2})\text{Cu}_3\text{Ti}_2\text{Mn}_2\text{O}_{12}$ .
